# Supplementary material for: A Plastid-Localized Pentatricopeptide Repeat Protein is Required for Both Pollen Development and Plant Growth in Rice
Source: PubMed Central journal article supplement (PMC5597598; doi:10.1038/s41598-017-10727-x), 2017-09-13
Supplement: 41598_2017_10727_MOESM1_ESM.pdf [file 41598_2017_10727_MOESM1_ESM.pdf]

# **A Plastid-Localized Pentatricopeptide Repeat Protein Is Required for Both Pollen Development and Plant Growth in Rice**

Yu-Jun Liu<sup>a,b,‡</sup>, Xuejiao Liu<sup>a,‡</sup>, Chen Hao<sup>a</sup>, Peng Zheng<sup>a</sup>, Wenyi Wang<sup>a</sup>, Liangchao Wang<sup>a</sup>, Jianhua Zhang<sup>b,\*</sup>, Jumin Tu<sup>a,\*</sup>

<sup>a</sup>Institute of Crop Science, College of Agriculture and Biotechnology, Zhejiang University, Hangzhou 310058, PR China

<sup>b</sup>State Key Lab of Agrobiotechnology, School of Life Science, The Chinese University of Hong Kong, N.T. Hong Kong

<sup>‡</sup>These authors contributed equally to this work.

\*Corresponding Authors:

Jianhua Zhang, Rm G88, Science Centre South Block, CUHK, N.T. Hong Kong. E-mail: [jhzhang@cuhk.edu.cn](mailto:jhzhang@cuhk.edu.cn) Tel: 852-3943-6288

Jumin Tu, Yu-Hang-Tang Rd. 866, Xihu District, Hangzhou 310058, PR China. E-mail: [jtu@zju.edu.cn](mailto:jtu@zju.edu.cn) Tel: 86-8898-2835

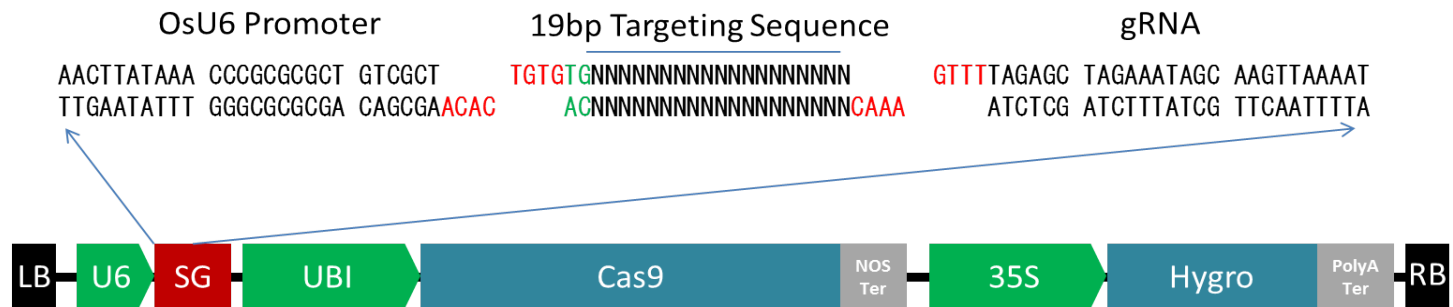

### Feature of plasmid

|            |                       |                  |                             |
|------------|-----------------------|------------------|-----------------------------|
| <b>LB</b>  | Left border of T-DNA  | <b>Cas9</b>      | Optimized Cas9              |
| <b>RB</b>  | Right border of T-DNA | <b>NOS Ter</b>   | NOS terminator              |
| <b>U6</b>  | Rice U6 promoter      | <b>35S</b>       | CaMV 35S promoter           |
| <b>SG</b>  | sgRNA                 | <b>Hygro</b>     | Hygromycin selection marker |
| <b>UBI</b> | UBI promoter          | <b>PolyA Ter</b> | PolyA terminator            |

**Figure S1. sgRNA-CRISPR/Cas9 plant expression vector.**

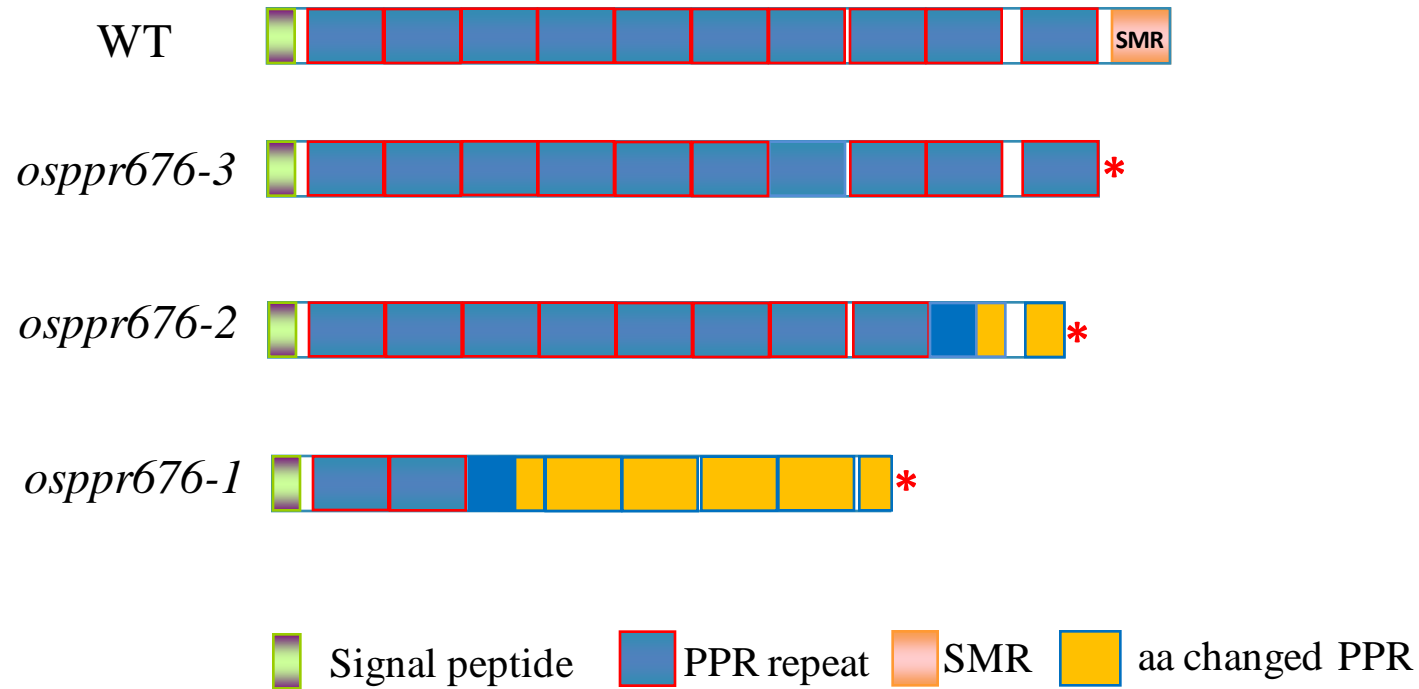

**Figure S2. Truncated proteins structure of *osppr676-1*, *osppr676-2*, *osppr676-3*.**

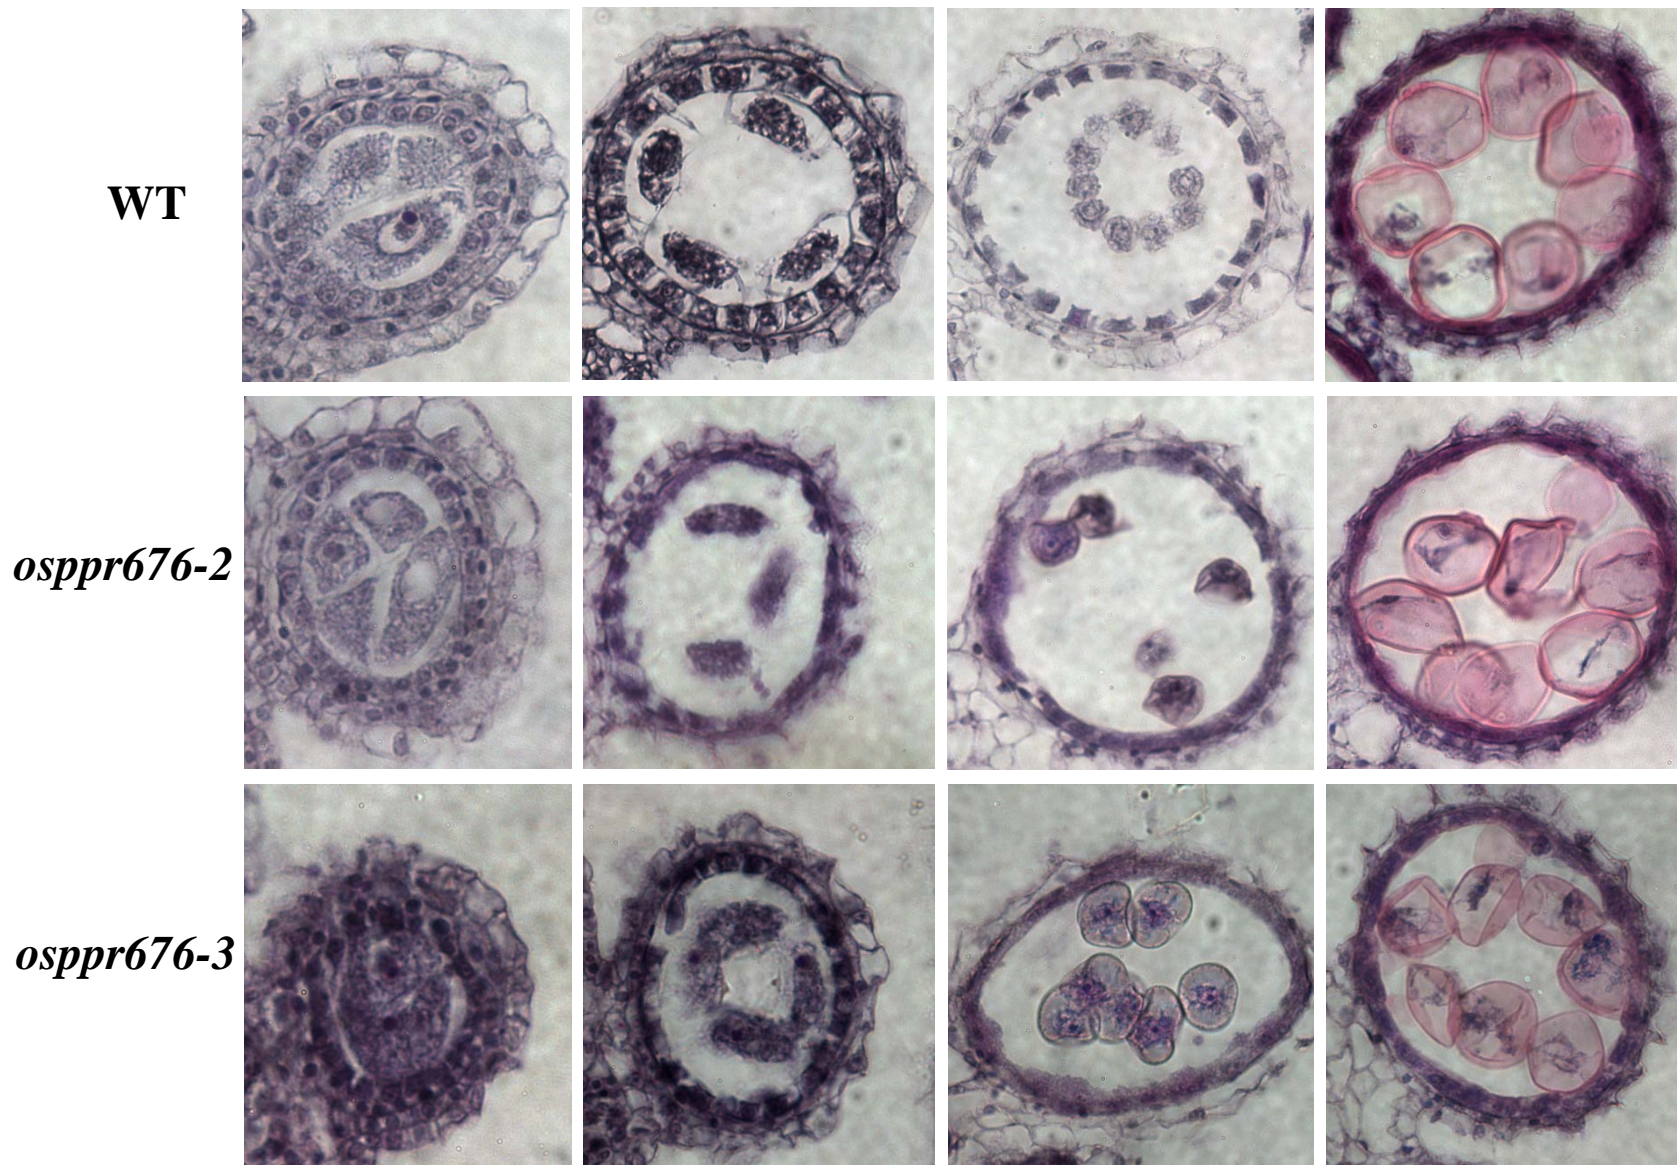

**Figure S3. Comparison of cross sections of anthers from wild type and *osprr676-2* and *osprr676-3* mutants.**

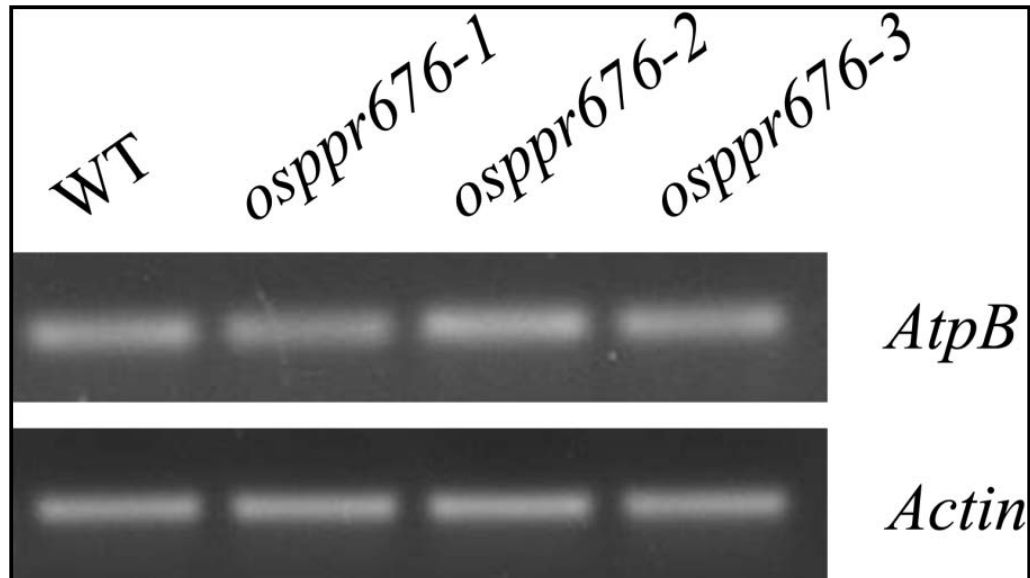

**Figure S4. No significant difference was detected in mRNA accumulation of *atpB* in WT and *osppr676* mutants.**



|          |                                                                                                                                                                   |     |
|----------|-------------------------------------------------------------------------------------------------------------------------------------------------------------------|-----|
| SVR7     | MSFHLLCS <span style="background-color: black; color: black;">SPSSLLHDPFLPCNLLSVYEKSTPRSFSSYNENSSHFHSRNLLQATHVSVQEAIEQSEKSKIVDVDFPIPEPTASKSYVWVNEKSPRASQL</span>  | 100 |
| ATP4     | MASLPLCR <span style="background-color: black; color: black;">SPSSLLPS</span> .....WEHRPISASENFKNES.SFVAAHVSVQETPPQPQDPSPEFSDS...NENGRTPSSSSNTRFIVWVNEKSPRAADV    | 85  |
| OsPPR676 | .....MAS <span style="background-color: black; color: black;">SPSSLLS</span> .....WEHRAISLSFQPKNESEFATARVSVQDPPP.....EESDA...NPSFGR..SSNTRSRYVWVNEKSPRAZAGL       | 71  |
| SVR7     | RRKSYDS.RYSS <span style="background-color: black; color: black;">LTKLAESLDACKFNADVCDVITG.FGGKLEEQDAVVLIN.NMINPETAFIVINNLETMKFSREVILYNVIMVVERKSKDLEKSEK</span>    | 196 |
| ATP4     | ARARAGSGRRAR <span style="background-color: black; color: black;">IASPAAAGACETTESAVEAALQAAEPEPPSEQDAVIVLNTAAATRAETAVALRWFELGNKAVRKKVILYNVVLKLRKKRIWSETEA</span>   | 185 |
| OsPPR676 | ARARAGSGRRAR <span style="background-color: black; color: black;">IAAPAAATAACEAGAEVAALAAEAPEPPSEQDAVIVLN.TTSAREAAVVIAVWVFLRNAEVRKEVILYNVALKLRKRRRFSWDAEA</span>   | 170 |
| SVR7     | <span style="background-color: black; color: black;">LFDMLERGIKIPDNATETLISCARQNCVPKFAVEWEKMSFQCEPDNVMAAMIDAYGRAGNVDMAISLYDRARTEKRRIDAVTFSLIRIYGVSGNY</span>       | 296 |
| ATP4     | <span style="background-color: black; color: black;">LWAEMLRDGVCQPDNATESIVLSCARACCLHSAVEWEDKMPFEGCSPDMIYSAVIDAYGHAGNSEAALRLYDRARAERWQDDEVICSTVIVKHVHSTSGNF</span> | 285 |
| OsPPR676 | <span style="background-color: black; color: black;">LWBEMLRECVCQPDNATESIVLSCARACCMPGRAVEWEKMPFEGCSPDMIYSAVIDAYGRAGDAETALRLYDRARAERWQDDEVICATVIRVHSSSGNF</span>   | 270 |
| SVR7     | <span style="background-color: black; color: black;">DGCINLYEEMKAGVKFNIVVYNRLIDSMGRAKREFCAKIIYKDLITNGFTENWSTYAAIVFAYCRARYGDDATAIYREMKKGLSLTVILYNLLSMCA</span>     | 396 |
| ATP4     | <span style="background-color: black; color: black;">DGCINLYEEMKAGVRFNIVVYNIMLIDMGRALREFVVKTIHREMVDQCVQESFATYCCILHAYTRARYGEDAMAVYRUMKDEAMGIDVLYNMLLSMCA</span>    | 385 |
| OsPPR676 | <span style="background-color: black; color: black;">DGCINLYEEMKAGVKFNIVVYNIVLIDMGRAMREFVVKTIHRELVSQEAVENTKATYCCILHAYTRARYGEDAMAVYRUMKDEVMIDVLYNMLLSMCA</span>    | 370 |
| SVR7     | <span style="background-color: black; color: black;">DNRVYDEAEELIQDMKN.CETCDPDSWTFSSLLTVYACSGFVSEAEAPLQMRAGEEETLEVLTSVIOCYGKAKQVDDVVRTEFCVLELGIIPDDRFC</span>     | 494 |
| ATP4     | <span style="background-color: black; color: black;">DICVYDEAEELIRDMKASMGASHKPDSSYSSMVLLYSSTANVLSAEGIINEMVEAGEKENIEVLTSILRCYGVGRITDDVVRSEGMQLDLGIIPDDRFC</span>   | 485 |
| OsPPR676 | <span style="background-color: black; color: black;">DICVYEEAEELIRDMKASMDRSRSPDSSYSSMVLLYSCTGNVACAEGIINEMVEAGEKENIEVLTSILRCYGVGRITDDVVRSEAMLEDLGIIPDDRFC</span>   | 470 |
| SVR7     | <span style="background-color: black; color: black;">GCLINVMQTQTESEIIGKILICVEKAKPKLGVVVMVVEEQNCEEGVFKKEASELIDSIGSDVKKAMINCLIDICVNINKLEFACETLQGLGYDIYTGILQ</span>  | 594 |
| ATP4     | <span style="background-color: black; color: black;">GCLISVAANTEAEELGKVISCIERSNVQLGAVVKLIVD.RSS.SESFREARELLRSSRGVVKMEVQNCIMDIOVNINQMEKACALLDAAQQLGIYANIQ</span>   | 583 |
| OsPPR676 | <span style="background-color: black; color: black;">GCLITVAACTEAEELGKVICCIDRSSAQLGAVVRIIVD.AAAPSEPLREAPAGELLGGARGVVRMEVQNCIMDIAVNLSQMEKACALLDVALRLGIYSNVQ</span> | 569 |
| SVR7     | <span style="background-color: black; color: black;">SKSATQWSLHLKSLSLGAALTALHVVMNDISEAALESGEFPPLLGINTCGKHKYSKGLIAPVFESHLKEINAPFHEAPDKVGFLLTTSVAAKAWLESR</span>    | 694 |
| ATP4     | <span style="background-color: black; color: black;">TRTQTQWSLHLRCLSVGAALTTLHVVMNDLYTSLQTGNEGIPPLLGITHTCGKNTYSRGLIAPMFAHLKELDAPFHEAPDKAGWFLTTVAAKQWLESK</span>    | 683 |
| OsPPR676 | <span style="background-color: black; color: black;">TRTQTQWSLHLRCLSVGAALTTLHVVMNDLYAALQAG.DELPPLLGITHTCGKNTYSYKGLIAPVFESHLKELDAPFHEAPDKAGWFLTTSVAAREWLETK</span> | 668 |
| SVR7     | RSAGCVSA                                                                                                                                                          | 702 |
| ATP4     | AASEIVTV                                                                                                                                                          | 691 |
| OsPPR676 | KSAEIVAV                                                                                                                                                          | 676 |

Figure S5. Protein sequences alignment of SVR7, ATP4 and OsPPR676.

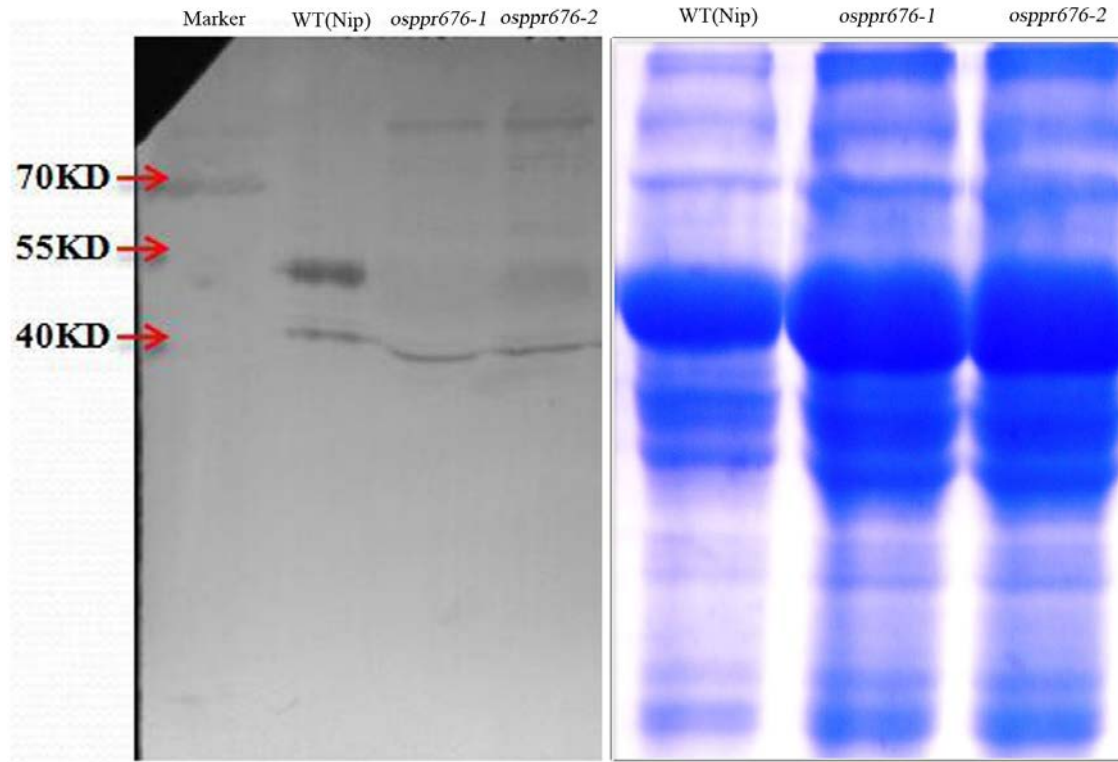

**Figure S6. Absence of AtpB subunit production in rice *osppr676* mutants.** Western blot analysis with AtpB antibody on total proteins from the *osppr676-1* and *osppr676-2* mutants and WT seedlings and Coomassie Blue staining of the loading amount of samples. The size of target atpB band is 54KD, and these bands about 40KD are unspecific bands.

**Table S1. Primers used in this study.**

| <b>Primer name</b> | <b>Primer Sequence (5'–3')</b>   | <b>Use for</b>                                    |
|--------------------|----------------------------------|---------------------------------------------------|
| OsPPR676 MF        | CTCAACGTGTTCGAGGAAAT             | Confirm <i>osprr676-1</i> mutant                  |
| OsPPR676 MR        | CAGTTGCAGTACGGCATCCT             | Confirm <i>osprr676-1</i> mutant                  |
| GT638-F            | CACCTTCTCGACCGTCATCA             | Confirm <i>osprr676-2</i> mutant                  |
| GT638-R            | CGCCTTCATTCCTCGAACA              | Confirm <i>osprr676-2</i> mutant                  |
| GT640-F            | CCTCACCTCGCTCATCCGTT             | Confirm <i>osprr676-3</i> and <i>676-4</i> mutant |
| GT640-R            | AGCAGCGGGCGGAGCTCGT              | Confirm <i>osprr676-3</i> and <i>676-4</i> mutant |
| OsPPR676-ENF1      | CACCATGGCTTCCCCTTCCTCCCT         | Construct pENTR vector                            |
| OsPPR676-ENR1      | CACCGCTACTAACTCTGCCG             | Construct pENTR vector                            |
| OsBTF3-ENF1        | CACCATGAATGTTGACAAGCTCAA         | Construct pENTR vector                            |
| OsBTF3-ENR1        | TGATTCCTTTTCTCTTCTG              | Construct pENTR vector                            |
| OsPPR676 probe F   | GAGGACGCCATGGCCGTG               | RNA in situ hybridization                         |
| OsPPR676 probe R   | TCACCATGGATGAGTAGC               | RNA in situ hybridization                         |
| OsPPR676 RF1       | GACCATCCACAGGGAGCTAGT            | Real-time PCR                                     |
| OsPPR676 RR1       | ACAAGGCGACGTACTGCTG              | Real-time PCR                                     |
| OsPPR676- OE-F     | CTAGTCTAGACAGAGAGCATCGCGC        | Construct over-expression vector                  |
| OsPPR676- OE-R     | CGGGTACCCATTGTTGCGTTTTACAC       | Construct over-expression vector                  |
| OsPPR676- KpnI     | GATCGGTACCGGATGACCTCCTTGCGAACCTC | Construct RNAi vector                             |
| OsPPR676-BamHI     | GATCGGATCCCGCCCGTGTCTCCGTCCAA    | Construct RNAi vector                             |
| OsPPR676- SpeI     | GATCACTAGTGGATGACCTCCTTGCGAACCTC | Construct RNAi vector                             |
| OsPPR676- SacI     | GATCGAGCTCCGCCCGTGTCTCCGTCCAA    | Construct RNAi vector                             |



**Table S2. Multiple *osprr676* lines created by CRISPR/Cas9 mutation system.**

| <b>Mutation site</b>                          | <b>Mutation type</b> |
|-----------------------------------------------|----------------------|
| <b><i>OsPPR676</i> SG638 site</b>             |                      |
| GGTGCTCGCCGGACATGCTCACGTACT-CGGCGGTGATCGACGC  | WT                   |
| GGTGCTCGCCGGACATGCTCACGTACC-CGGCGGTGATCGACGC  | D1, +1               |
| GGTGCTCGCCGGACATGCTCACGTACTTCGGCGGTGATCGACGC  | +1                   |
| GGTGCTCGCCGGACATGCTCACGTCT-CGGCGGTGATCGACGC   | D1, +1               |
| GGTGCTCGCCGGACATGCTCACGT----CGGCGGTGATCGACGC  | D3                   |
| GGTGCTCGCCGGACATGCTCAGGTA---CGGCGGTGATCGACGC  | D6, +4               |
| GGTGCTCGCCGGACATGCTCACGTACT-CGGGGGTGATCGACGC  | D1, +1               |
| GGTGCTCGCCGGACATGCTCACGTA---CGGCGGTGATCGACGC  | D2                   |
| GGTGCTCGCCGGACATGCTCACGTCT----GGCGGTGATCGACGC | D4, +1               |

***OsPPR676* SG640 site**

|                                                                 |          |
|-----------------------------------------------------------------|----------|
| CGTCCGGGGT <b>GATGCCGAGGTCCT</b> -CGA- <b>GCATGGCGAATGACCT</b>  | WT       |
| CGTCCGGGGT <b>GATGCCGAGGTGCTCAAT</b> -GCATGGCGAATGACCT          | D6, +7   |
| CGTCCGGGGT <b>GCCGCAGAGGTCCT</b> -CAA- <b>GAATGGCGAATGACCT</b>  | D18, +18 |
| CGTCCGGGGT <b>GATGCCGAGGTGCT</b> - <b>CAATGCC</b> TGGCGAATGACCT | D10, +10 |
| <b>CGTCCGGGGT<b>GATGCCGAGGTCCT</b>-C---GCATGGCGAATGACCT</b>     | D2       |
| CGTCCGGGGT <b>GATGCCGAGGTCCT</b> -CGA <b>A</b> GCATGGCGAATGACCT | +1       |
| CGTCCGGGGT <b>GATGCCGAGGTCC</b> ----A-GCATGGCGAATGACCT          | D3       |
| CGTCCGGGGT <b>GATGCCGAGGTC</b> -----GCATGGCGAATGACCT            | D5       |
| CGTCCGGGGT <b>GATGCCGAGGTCCT</b> -CGA-- <b>T</b> ATGGCGAATGACCT | D2, +1   |

***OsPPR676* SG641 site**

|                                                               |        |
|---------------------------------------------------------------|--------|
| GGACGCAGAC <b>GCAGTGGTCGCTGCACCTGA</b> <b>GGG</b> GCCTCTCCGT  | WT     |
| GGACGCAGACGCAGTGGTCGCTGCACC-GAGGGGCCTCTCCGT                   | D1     |
| GGACGCAGACGCAGTGGTCG <b>TTG</b> --- <b>G</b> TGAGGGGCCTCTCCGT | D7, +4 |

|                                             |          |
|---------------------------------------------|----------|
| GGGGCCTCACCGTCGGGTCCGTGC---TGAGGGGCCTCTCCGT | D25, +22 |
| GGACGCAGACGCAGTGGTCGCTGCAC-TGAGGGGCCTCTCCGT | D1       |
| GGACGCAGACGCAGTGGTCGCTGTAC-TGAGGGGCCTCTCCGT | D3, +2   |
| GGACGCAGACGCAGT-----GGCCTCTCCGT             | D17      |
| GGACGCAGACGCAGTGGTCGCTGCC-TGAGGGGCCTCTCCGT  | D3, +2   |
| GG-----GGCCTCTCCGT                          | D30      |
| GGACGCAGACGCAGTGGTCGCTGCAT-GGAGGGGCCTCTCCGT | D3, +2   |

---

The wild type sequence is shown at the top with the PAM sequence highlighted in brown and the target sequence in blue. Red dashes, deleted bases; red bases, insertions or mutations. Green sequences, *ospPr676-1* mutation; yellow sequences, *ospPr676-2* mutation; purple sequences, *ospPr676-3* mutation. The net change in length is to the right of each sequence (+, insertion; D, deletion). Note that some alterations have both sequence insertions and deletions.

**Table S3. Predicted possible off-target sites of SG638, SG640 and SG641 by CRISPR-P (<http://cbi.hzau.edu.cn/crispr/>).**

| SG638 position: Chr3:-6090845                              |       | Guide sequence: GGACATGCTCACGTACTCGG <b>CGG</b> |                 |                |        |  |
|------------------------------------------------------------|-------|-------------------------------------------------|-----------------|----------------|--------|--|
| Predicted off-target sites for SG638 site:                 |       |                                                 |                 |                |        |  |
| Sequence                                                   | Score | MMs                                             | Locus           | Gene           | Region |  |
| GGACT <b>TTGC</b> CACGTACTCGG <b>GGG</b>                   | 0.6   | 4MMs                                            | Chr12: -2141485 | LOC_Os12g04960 | exon   |  |
| GGTCAT <b>CCGC</b> AGGTACTCGG <b>CGG</b>                   | 0.3   | 4MMs                                            | Chr1: +33066673 | LOC_Os01g57230 | exon   |  |
| <b>C</b> GACATGC <b>CC</b> CACGC <b>AC</b> AGG <b>CGG</b>  | 0.1   | 4MMs                                            | Chr11: -3818498 | LOC_Os11g07530 | exon   |  |
| GGTC <b>AGG</b> CTC <b>AAGT</b> GCTCGG <b>TGG</b>          | 0.1   | 4MMs                                            | Chr6: -19265675 | LOC_Os06g33090 | intron |  |
| GGTC <b>AGG</b> CTC <b>AAGT</b> GCTCGG <b>TGG</b>          | 0.1   | 4MMs                                            | Chr6: -19271440 | LOC_Os06g33100 | exon   |  |
| GGTC <b>AGG</b> CTC <b>AAGT</b> GCTCGG <b>TGG</b>          | 0.1   | 4MMs                                            | Chr6: -19258290 | LOC_Os06g33080 | exon   |  |
| GGAC <b>AGA</b> CTCACGTACTC <b>CCAGG</b>                   | 0.1   | 4MMs                                            | Chr10: +4041974 | LOC_Os10g07542 | exon   |  |
| SG640 position: Chr3:+6090129                              |       | Guide sequence: GATGCCGAGGTCTCGAGCA <b>TGG</b>  |                 |                |        |  |
| Predicted off-target sites for SG640 site:                 |       |                                                 |                 |                |        |  |
| Sequence                                                   | Score | MMs                                             | Locus           | Gene           | Region |  |
| <b>GGAGT</b> CGAGGG <b>CCT</b> CGAGCAC <b>CGG</b>          | 0.8   | 4MMs                                            | Chr3: +862609   | LOC_Os03g02430 | exon   |  |
| GATGCCGAGGT <b>CCTTGAGC</b> <b>TGG</b>                     | 0.7   | 2MMs                                            | Chr4: +1026229  | LOC_Os04g02690 | exon   |  |
| GAGGCCGAGG <b>GA</b> CTCGAGCAC <b>CGG</b>                  | 0.7   | 3MMs                                            | Chr6: -3650122  | LOC_Os06g07560 | exon   |  |
| <b>ATTG</b> CCGAG <b>CTC</b> CTCGAG <b>CTCGG</b>           | 0.7   | 4MMs                                            | Chr4: +7155034  | LOC_Os04g12960 | exon   |  |
| <b>ATTG</b> CCGAG <b>CTC</b> CTCGAG <b>CTCGG</b>           | 0.7   | 4MMs                                            | Chr4: +7026047  | LOC_Os04g12690 | exon   |  |
| GATG <b>AGG</b> AGGT <b>CTC</b> CGAGCAC <b>CGG</b>         | 0.6   | 3MMs                                            | Chr3: +5590948  | LOC_Os03g10880 | exon   |  |
| GATG <b>AGG</b> AGGT <b>CTC</b> CGAGCAC <b>CGG</b>         | 0.6   | 3MMs                                            | Chr5: -26749777 | LOC_Os05g46120 | exon   |  |
| <b>GGCGC</b> AGAGG <b>AC</b> CTCGAGCAC <b>CGG</b>          | 0.5   | 4MMs                                            | Chr1: +40677374 | LOC_Os01g70250 | exon   |  |
| GATG <b>AC</b> GAGGT <b>CTC</b> CGAG <b>CACGG</b>          | 0.4   | 3MMs                                            | Chr1: +21944968 | LOC_Os01g39040 | exon   |  |
| SG641 position: Chr3:-6089774                              |       | Guide sequence: GCAGTGGTCGCTGCACCTGA <b>GGG</b> |                 |                |        |  |
| Predicted off-target sites for SG641 site:                 |       |                                                 |                 |                |        |  |
| Sequence                                                   | Score | MMs                                             | Locus           | Gene           | Region |  |
| GC <b>GG</b> AGGTCGCTGCAC <b>CTCACGG</b>                   | 1     | 3MMs                                            | Chr8: -20013729 | LOC_Os08g32310 | exon   |  |
| GCAG <b>AGG</b> AGCTGCAG <b>CTGAAGG</b>                    | 0.2   | 4MMs                                            | Chr2: -31996582 | LOC_Os02g52250 | exon   |  |
| GC <b>TGG</b> GT <b>CG</b> TGCT <b>CTG</b> TAT <b>G</b>    | 0.2   | 4MMs                                            | Chr4: +11721509 | LOC_Os04g20880 | exon   |  |
| <b>GA</b> ACTGGTCGCTGCAG <b>CTCAAGG</b>                    | 0.1   | 4MMs                                            | Chr2: +32995893 | LOC_Os02g53890 | exon   |  |
| GC <b>CGT</b> GGT <b>CCT</b> GCAT <b>CTG</b> <b>CGG</b>    | 0.1   | 4MMs                                            | Chr6: +597759   | LOC_Os06g02054 | exon   |  |
| <b>GG</b> AGTGGT <b>CA</b> CTGCAG <b>CTGG</b> <b>CGG</b>   | 0.1   | 4MMs                                            | Chr1: +1869038  | LOC_Os01g04230 | exon   |  |
| GC <b>G</b> GTGGT <b>CGC</b> AG <b>AGC</b> CTG <b>ACGG</b> | 0     | 4MMs                                            | Chr5: -1541161  | LOC_Os05g03610 | exon   |  |

**Table S4. The seed-setting rate was reduced in *osprr676* RNAi lines 15 and 19.**

| Lines       | No.of filled grains per plant | No.of total grains per plant | seed-setting rate <sup>a</sup> (%) |
|-------------|-------------------------------|------------------------------|------------------------------------|
| WT          | 801.9 ± 18.2                  | 960.7 ± 12.4                 | 83.5 ± 1.4                         |
| RNAi line15 | 358.1 ± 8.1                   | 764.8 ± 13.2                 | 46.9 ± 1.4 <sup>b</sup>            |
| RNAi line19 | 674.1 ± 6.8                   | 995.6 ± 7.5                  | 67.7 ± 0.3 <sup>b</sup>            |

<sup>a</sup>The seed-setting rate was measured based on three replications, each replication has three plants.

<sup>b</sup>Significantly different from control at  $p < 0.01$  by two-tailed *t*-test.



**Table S5.****Total Soluble Fatty Acids of Wild-Type and Mutant Anthers.**

| Acids         | Wild-Type                     | <i>Osppr676-2</i> |         | <i>Osppr676-1</i> |         |
|---------------|-------------------------------|-------------------|---------|-------------------|---------|
|               | Mean±SD<br>(ug/mg Dry Weight) |                   | up      |                   | up      |
| C12 acid      | 0.394 ± 0.055                 | 0.104 ± 0.057     | -73.60% | 0.090 ± 0.009     | -77.16% |
| C14 acid      | 0.484 ± 0.171                 | 0.103 ± 0.013     | -78.72% | 0.372 ± 0.127     | -23.14% |
| C16 acid      | 7.183 ± 1.223                 | 5.230 ± 0.403     | -27.19% | 3.564 ± 0.809     | -50.38% |
| C18 (2/3)acid | 7.534 ± 0.513                 | 4.273 ± 0.562     | -43.28% | 3.530 ± 0.120     | -53.15% |
| C18 (0/1)acid | 3.190 ± 0.797                 | 2.239 ± 0.065     | -29.81% | 1.515 ± 0.025     | -52.51% |
| C20(1/2)acid  | 2.918 ± 0.546                 | 0.715 ± 0.014     | -75.50% | 0.121 ± 0.049     | -95.85% |
| C20 acid      | 0.250 ± 0.020                 | 0.183 ± 0.003     | -26.80% | 0.135 ± 0.004     | -46.00% |
| C22 acid      | 0.141 ± 0.065                 | 0.069 ± 0.024     | -51.06% | 0.039 ± 0.006     | -72.34% |
| C24 acid      | 0.129 ± 0.032                 | 0.054 ± 0.011     | -58.14% | 0.041 ± 0.008     | -68.22% |
| C26 acid      | 0.155 ± 0.033                 | 0.086 ± 0.011     | -44.52% | 0.134 ± 0.053     | -13.55% |
| Total acids   | 22.377 ± 2.769                | 13.057 ± 0.171    | -41.65% | 9.541 ± 0.670     | -57.36% |
